# Supplementary material
Source: publisher figshare collection journal article supplement (https://acs.figshare.com/ndownloader/files/3761896)
Supplement: Supplementary file 1 [file 3761896]

Compound	SMILES	MT1 Ki (nM)	MT1 Emax (%)	MT1 EC50 (nM)	MT2 Ki (nM)	MT2 Emax (%)	MT2 EC50 (nM)
melatonin	COC1=CC=C(NC=C2CCNC(C)=O)C2=C1	0.23	123	1.7	0.52	76	0.4
6a	[H]N2C1=CC=CC(OC)=C1CCC2CNC(CC)=O	57	70�5	906	21	98	165
6d	[H]N2C1=CC=CC=C1CCC2CNC(CC)=O	13	37	242	2.2	86	27
6h	[H]N2C1=CC=CC(OC)=C1CCC2CNC(NCC)=O	480	nd	nd	114	nd	nd
6i	[H]N2C1=CC=CC=C1CCC2CNC(NCC)=O	115	30	2420	17	80	356
6j	[H]N2C1=CC=CC(OC)=C1CCC2CNC(NCC)=S	>1000	nd	nd	>1000	nd
6k	[H]N2C1=CC=CC=C1CCC2CNC(NCC)=S	305	35	2660	90	72	1430
6l	CN2C1=CC=CC(OC)=C1CCC2CNC(NCC)=O	5	92	160	1.4	105	10
6m	O=C(NCC)NCC2N(C)C1=CC=CC=C1CC2	5.3	69	110	3.4	97	6.2
6n	O=C(NCC)NCC2N(CC3=CC=CC=C3)C1=CC=CC(OC)=C1CC2	132	44	393	2.9	107	13
7	O=C(CC)NCC1=NC2=C(C(OC)=CC=C2)C=C1	>10000	nd	nd	4450	nd	nd
8a	O=C(CC)NCC2N(CC3=CC=CC=C3)C1=CC=CC(OC)=C1CC2	17	79	177	0.001	111	0.9
8b	COC1=CC=C(N(CC3=CC=CC=C3)C(CNC(CC)=O)CC2)C2=C1	186	nd	nd	1.5	75	4.6
8c	O=C(CC)NCC2N(CC3=CC=CC=C3)C1=CC(OC)=CC=C1CC2	214	nd	nd	26	42	25
8d	O=C(CC)NCC2N(CC3=CC=CC=C3)C1=CC=CC=C1CC2	37	42	36	0.09	73	0.4
8e	O=C(C)NCC2N(CC3=CC=CC=C3)C1=CC=CC=C1CC2	45	35	31	0.04	60	0.4
(-)-8e	O=C(C)NCC2N(CC3=CC=CC=C3)C1=CC=CC=C1CC2	45	52	192	0.1	80	1.9]
(+)-8e	O=C(C)NCC2N(CC3=CC=CC=C3)C1=CC=CC=C1CC2	122	nd	nd	6.2	60	19
8f	O=C(C4CC4)NCC2N(CC3=CC=CC=C3)C1=CC=CC=C1CC2	291	nd	nd	0. 2	38	0.3
8g	O=C(C4CCC4)NCC2N(CC3=CC=CC=C3)C1=CC=CC=C1CC2	633	nd	nd	6.2	<15	nd
8h	CN2C1=CC=CC(OC)=C1CCC2CNC(CC)=O	0.03	112	1.7	0.5	122	0.5
8i	CN2C1=CC=CC=C1CCC2CNC(CC)=O	0.7	69	0.9	0.2	122	0.6
8j	O=C(C)NCC2N(CCC3=CC=CC=C3)C1=CC=CC=C1CC2	171	nd	nd	3	<15	nd
8k	O=C(C)NCC2N(CCC)C1=CC=CC=C1CC2	5.8	39	2	0.1	58	0.2
8l	O=C(CC)NCC2N(CC(NC)=O)C1=CC=CC=C1CC2	>10000	nd	nd	385	nd	nd
11	O=C(CC)NCC2N(C3=CC=CC=C3)C1=CC=CC=C1CC2	1.6	69	6.2	0.06	90	0.5
13	CN2C1=CC=CC=C1CCC2CNC(NCC)=S	22	76	809	15	73	66
15	O=C(CC)NCCC2N(CC3=CC=CC=C3)C1=CC=CC=C1CC2	326	nd	nd	1.6	59	4.7
